# Supplementary material for: Field-induced slow magnetic relaxation from linear trinuclear CoIII–CoII–CoIII to grid [2 × 2] tetranuclear mixed-valence cobalt complexes
Source: Royal Society of Chemistry journal article supplement (doi:10.1039/d0dt02863k), 2020-01-01
Supplement: d0dt02863k1.pdf [file d0dt02863k1.pdf]

## Supporting Information

### Field-induced slow magnetic relaxation from linear trinuclear Co<sup>III</sup>–Co<sup>II</sup>–Co<sup>III</sup> to grid [2 × 2] tetranuclear mixed-valence cobalt complexes

Meng Yang<sup>§</sup>, Zhi-Jian Ouyang<sup>§</sup>, Yun-Jing Zhong, Jia-Wei Cai, Xiao-Hui Li and Wen Dong\*

#### Contents of the Supporting Information

**Table S1.** Crystallographic data for complexes **1–4**.

**Table S2.** Co–O and Co–N bond lengths (Å) and BVS values for Co atoms of complex **1**.

**Table S3.** Selected bond angles (°) for complex **1**.

**Table S4.** Co–O and Co–N bond lengths (Å) and BVS values for Co atoms of complex **2**.

**Table S5.** Selected bond angles (°) for complex **2**.

**Table S6.** Co–O and Co–N bond lengths (Å) and BVS values for Co atoms of complex **3**.

**Table S7.** Selected bond angles (°) for complex **3**.

**Table S8.** Co–O and Co–N bond lengths (Å) and BVS values for Co atoms of complex **4**.

**Table S9.** Selected bond angles (°) for complex **4**.

**Table S10.** SHAPE analysis for complexes **1–4**.

**Fig. S1** ORTEP views (30% thermal ellipsoids) for complexes **1–4**.

**Fig. S2** Structural illustrations of complex **2**.

**Fig. S3** The 1D structure through the  $\pi\cdots\pi$  stacking interaction between naphthalene rings and the 2D layer through hydrogen-bonds and the  $\pi\cdots\pi$  stacking interaction between naphthalene rings of complex **1**.

**Fig. S4** Structural illustrations of complex **4**.

**Fig. S5** The 1D structure of complex **3** through the  $\pi\cdots\pi$  stacking interaction between naphthalene rings.

**Fig. S6** Powder X-ray diffraction (PXRD) patterns for complexes **1–4**.

**Fig. S7** Temperature dependence of the in-phase and out-of-phase for complexes **1–4** at zero DC-external field.

**Fig. S8** AC susceptibility data for complexes **1–4** at 2 K under DC applied fields in the range 0–1000 Oe.

**Fig. S9** Frequency dependence of the in-phase components for the ac magnetic susceptibility in a 1 kOe dc field for complexes **1** and **2**.

**Fig. S10** Frequency dependence of the in-phase components for the ac magnetic susceptibility in a 1 kOe dc field for complexes **3** and **4**.

**Fig. S11** Cole–Cole plots for complex **2**.

**Table S1.** Crystallographic data for complexes **1–4**.

| Complex                                                      | <b>1</b>                                                                        | <b>2</b>                                                                        | <b>3</b>                                                                          | <b>4</b>                                                                                         |
|--------------------------------------------------------------|---------------------------------------------------------------------------------|---------------------------------------------------------------------------------|-----------------------------------------------------------------------------------|--------------------------------------------------------------------------------------------------|
| Formula                                                      | C <sub>60</sub> H <sub>74</sub> Co <sub>3</sub> N <sub>28</sub> O <sub>19</sub> | C <sub>56</sub> H <sub>60</sub> Co <sub>3</sub> N <sub>28</sub> O <sub>16</sub> | C <sub>134</sub> H <sub>138</sub> Co <sub>6</sub> N <sub>66</sub> O <sub>32</sub> | C <sub>130</sub> H <sub>134</sub> Co <sub>6</sub> N <sub>58</sub> O <sub>30</sub> S <sub>8</sub> |
| Formula weight                                               | 1668.26                                                                         | 1558.11                                                                         | 3538.68                                                                           | 3599.01                                                                                          |
| T (K)                                                        | 100.00(10)                                                                      | 120(2)                                                                          | 100.0(4)                                                                          | 100(10)                                                                                          |
| Crystal system                                               | Monoclinic                                                                      | Triclinic                                                                       | Triclinic                                                                         | Triclinic                                                                                        |
| Space group                                                  | <i>P</i> 2 <sub>1</sub> / <i>n</i>                                              | <i>P</i> $\bar{1}$                                                              | <i>P</i> $\bar{1}$                                                                | <i>P</i> $\bar{1}$                                                                               |
| <i>a</i> (Å)                                                 | 12.46890(10)                                                                    | 9.3778(9)                                                                       | 15.3105(3)                                                                        | 14.8320(3)                                                                                       |
| <i>b</i> (Å)                                                 | 14.21320(10)                                                                    | 12.6936(11)                                                                     | 15.6182(3)                                                                        | 16.1866(3)                                                                                       |
| <i>c</i> (Å)                                                 | 19.8528(2)                                                                      | 13.7782(13)                                                                     | 16.7603(4)                                                                        | 16.9537(4)                                                                                       |
| $\alpha$ (deg)                                               | 90                                                                              | 89.076(4)                                                                       | 91.460(2)                                                                         | 93.051(2)                                                                                        |
| $\beta$ (deg)                                                | 95.6180(10)                                                                     | 83.116(4)                                                                       | 105.601(2)                                                                        | 104.841(2)                                                                                       |
| $\gamma$ (deg)                                               | 90                                                                              | 81.505(4)                                                                       | 101.919(2)                                                                        | 103.502(2)                                                                                       |
| $\theta$ / (deg)                                             | 3.831–76.996                                                                    | 2.51–27.584                                                                     | 2.223–27.5                                                                        | 2.716–76.925                                                                                     |
| <i>V</i> (Å <sup>3</sup> )                                   | 3501.47(5)                                                                      | 1610.4(3)                                                                       | 3762.90(14)                                                                       | 3797.95(15)                                                                                      |
| <i>Z</i>                                                     | 2                                                                               | 1                                                                               | 1                                                                                 | 1                                                                                                |
| <i>D</i> <sub>c</sub> (g·cm <sup>-3</sup> )                  | 1.582                                                                           | 1.607                                                                           | 1.562                                                                             | 1.574                                                                                            |
| $\mu$ (mm <sup>-1</sup> )                                    | 6.298                                                                           | 0.856                                                                           | 0.745                                                                             | 6.822                                                                                            |
| Unique reflns,<br><i>R</i> <sub>int</sub>                    | 7119/0.0356                                                                     | 7458/0.0570                                                                     | 17106/0.0618                                                                      | 15400/0.0501                                                                                     |
| GOF                                                          | 1.041                                                                           | 1.054                                                                           | 1.036                                                                             | 1.031                                                                                            |
| <i>R</i> <sub>1</sub> ( <i>I</i> > 2 $\sigma$ ( <i>I</i> ))  | 0.0446                                                                          | 0.0347                                                                          | 0.0437                                                                            | 0.0856                                                                                           |
| <i>wR</i> <sub>2</sub> ( <i>I</i> > 2 $\sigma$ ( <i>I</i> )) | 0.1206                                                                          | 0.0817                                                                          | 0.1020                                                                            | 0.2157                                                                                           |
| <i>R</i> <sub>1</sub> (all data)                             | 0.0482                                                                          | 0.0447                                                                          | 0.0698                                                                            | 0.0942                                                                                           |
| <i>wR</i> <sub>2</sub> (all data)                            | 0.1230                                                                          | 0.0857                                                                          | 0.1117                                                                            | 0.2226                                                                                           |

**Table S2.** Co–O and Co–N bond lengths (Å) and BVS values for Co atoms of complex **1**.

| Complex <b>1</b> |                 |                                                                         |                                                                          |
|------------------|-----------------|-------------------------------------------------------------------------|--------------------------------------------------------------------------|
| Bond             | Bond Length / Å | Bond Valence                                                            | Bond Valence                                                             |
|                  |                 | calculated by Co <sup>II</sup> –N/O<br><i>R</i> <sub>0</sub> parameters | calculated by Co <sup>III</sup> –N/O<br><i>R</i> <sub>0</sub> parameters |
| Co(1)–O(1)       | 2.0883(16)      | 0.336                                                                   | 0.295                                                                    |
| Co(1)–O(1')      | 2.0883(16)      | 0.336                                                                   | 0.295                                                                    |
| Co(1)–O(2)       | 2.1139(18)      | 0.314                                                                   | 0.275                                                                    |
| Co(1)–O(2')      | 2.1139(18)      | 0.314                                                                   | 0.275                                                                    |
| Co(1)–N(1)       | 2.1221(19)      | 0.337                                                                   | 0.311                                                                    |
| Co(1)–N(1')      | 2.1221(19)      | 0.337                                                                   | 0.311                                                                    |
|                  |                 | <b>Σv(Co<sup>II</sup>) = 1.974</b>                                      | <b>Σv(Co<sup>III</sup>) = 1.762</b>                                      |
| Co(2)–O(3)       | 1.8986(17)      | 0.561                                                                   | 0.493                                                                    |
| Co(2)–O(4)       | 1.9171(2)       | 0.534                                                                   | 0.469                                                                    |
| Co(2)–N(2)       | 1.901(2)        | 0.613                                                                   | 0.565                                                                    |
| Co(2)–N(3)       | 1.888(2)        | 0.635                                                                   | 0.584                                                                    |
| Co(2)–N(4)       | 1.896(2)        | 0.621                                                                   | 0.573                                                                    |
| Co(2)–N(5)       | 1.895(2)        | 0.623                                                                   | 0.575                                                                    |
|                  |                 | <b>Σv(Co<sup>II</sup>) = 3.587</b>                                      | <b>Σv(Co<sup>III</sup>) = 3.259</b>                                      |

Bond Valence =  $\exp[(R_0 - d_{ij})/b]$ ,  $R_0 = 1.685$  for Co<sup>II</sup>–O, 1.720 for Co<sup>II</sup>–N, 1.637 for Co<sup>III</sup>–O and 1.690 for Co<sup>III</sup>–N,  $b = 0.37$ .<sup>1</sup>

**Table S3.** Selected bond angles (°) for complex **1**.

| Complex <b>1</b> |           |                 |           |
|------------------|-----------|-----------------|-----------|
| Bond             | Angle / ° | Bond            | Angle / ° |
| O(1)–Co(1)–O(2)  | 90.54(7)  | O(1)–Co(1)–N(1) | 88.40(7)  |
| O(2)–Co(1)–N(1)  | 90.75(7)  | O(3)–Co(2)–O(4) | 90.05(8)  |
| O(3)–Co(2)–N(2)  | 164.91(8) | O(4)–Co(2)–N(2) | 89.37(8)  |
| O(3)–Co(2)–N(3)  | 84.72(8)  | O(4)–Co(2)–N(3) | 99.67(8)  |
| N(2)–Co(2)–N(3)  | 80.52(8)  | N(3)–Co(2)–N(5) | 95.32(8)  |
| N(3)–Co(2)–N(4)  | 176.08(8) | O(3)–Co(2)–N(5) | 90.32(8)  |
| O(4)–Co(2)–N(5)  | 164.97(8) | N(4)–Co(2)–N(5) | 80.77(8)  |
| O(3)–Co(2)–N(4)  | 95.53(8)  | O(4)–Co(2)–N(4) | 84.24(8)  |
| N(2)–Co(2)–N(4)  | 99.41(8)  | N(2)–Co(2)–N(5) | 94.12(8)  |

**Table S4.** Co–O and Co–N bond lengths (Å) and BVS values for Co atoms of complex **2**.

| Complex <b>2</b> |                 |                                                                         |                                                                          |
|------------------|-----------------|-------------------------------------------------------------------------|--------------------------------------------------------------------------|
| Bond             | Bond Length / Å | Bond Valence                                                            | Bond Valence                                                             |
|                  |                 | calculated by Co <sup>II</sup> –N/O<br><i>R</i> <sub>0</sub> parameters | calculated by Co <sup>III</sup> –N/O<br><i>R</i> <sub>0</sub> parameters |
| Co(1)–O(1)       | 2.1058(14)      | 0.321                                                                   | 0.282                                                                    |
| Co(1)–O(1')      | 2.1058(14)      | 0.321                                                                   | 0.282                                                                    |
| Co(1)–O(2)       | 2.1154(15)      | 0.312                                                                   | 0.274                                                                    |
| Co(1)–O(2')      | 2.1154(15)      | 0.312                                                                   | 0.274                                                                    |
| Co(1)–N(1)       | 2.1105(16)      | 0.348                                                                   | 0.321                                                                    |
| Co(1)–N(1')      | 2.1105(16)      | 0.348                                                                   | 0.321                                                                    |
|                  |                 | <b>Σv(Co<sup>II</sup>) = 1.962</b>                                      | <b>Σv(Co<sup>III</sup>) = 1.754</b>                                      |
| Co(2)–O(3)       | 1.8988(13)      | 0.561                                                                   | 0.493                                                                    |
| Co(2)–O(4)       | 1.8881(13)      | 0.577                                                                   | 0.507                                                                    |
| Co(2)–N(2)       | 1.8823(15)      | 0.645                                                                   | 0.595                                                                    |
| Co(2)–N(3)       | 1.8992(16)      | 0.616                                                                   | 0.568                                                                    |
| Co(2)–N(4)       | 1.8851(15)      | 0.640                                                                   | 0.590                                                                    |
| Co(2)–N(5)       | 1.9028(16)      | 0.610                                                                   | 0.563                                                                    |
|                  |                 | <b>Σv(Co<sup>II</sup>) = 3.649</b>                                      | <b>Σv(Co<sup>III</sup>) = 3.316</b>                                      |

Bond Valence =  $\exp[(R_0 - d_{ij})/b]$ ,  $R_0 = 1.685$  for Co<sup>II</sup>–O, 1.720 for Co<sup>II</sup>–N, 1.637 for Co<sup>III</sup>–O and 1.690 for Co<sup>III</sup>–N,  $b = 0.37$ .<sup>1</sup>

**Table S5.** Selected bond angles (°) for complex **2**.

| Complex <b>2</b> |           |                 |           |
|------------------|-----------|-----------------|-----------|
| Bond             | Angle / ° | Bond            | Angle / ° |
| O(1)–Co(1)–O(2)  | 92.69(6)  | O(1)–Co(1)–N(1) | 94.57(6)  |
| O(2)–Co(1)–N(1)  | 90.68(6)  | O(3)–Co(2)–O(4) | 88.98(6)  |
| O(3)–Co(2)–N(2)  | 85.15(6)  | O(3)–Co(2)–N(3) | 165.97(6) |
| O(3)–Co(2)–N(4)  | 92.23(6)  | O(3)–Co(2)–N(5) | 93.13(6)  |
| O(4)–Co(2)–N(2)  | 93.65(6)  | O(4)–Co(2)–N(3) | 90.34 (6) |
| O(4)–Co(2)–N(4)  | 85.48(6)  | O(4)–Co(2)–N(5) | 166.50(6) |
| N(2)–Co(2)–N(3)  | 80.90(7)  | N(2)–Co(2)–N(4) | 177.26(7) |
| N(2)–Co(2)–N(5)  | 99.81(7)  | N(3)–Co(2)–N(4) | 101.69(7) |
| N(3)–Co(2)–N(5)  | 90.80(7)  | N(4)–Co(2)–N(5) | 81.12(7)  |

**Table S6.** Co–O and Co–N bond lengths (Å) and BVS values for Co atoms of complex **3**.

| Complex <b>3</b>         |                 |                                                                         |                                                                          |
|--------------------------|-----------------|-------------------------------------------------------------------------|--------------------------------------------------------------------------|
| Bond                     | Bond Length / Å | Bond Valence                                                            | Bond Valence                                                             |
|                          |                 | calculated by Co <sup>II</sup> –N/O<br><i>R</i> <sub>0</sub> parameters | calculated by Co <sup>III</sup> –N/O<br><i>R</i> <sub>0</sub> parameters |
| Co(1)–O(1)               | 1.8915(16)      | 0.572                                                                   | 0.503                                                                    |
| Co(1)–O(3)               | 1.8935(17)      | 0.569                                                                   | 0.500                                                                    |
| Co(1)–N(1)               | 1.9118(19)      | 0.595                                                                   | 0.549                                                                    |
| Co(1)–N(6)               | 1.8870(19)      | 0.637                                                                   | 0.587                                                                    |
| Co(1)–N(7)               | 1.908(2)        | 0.602                                                                   | 0.555                                                                    |
| Co(1)–N(12)              | 1.8898(19)      | 0.632                                                                   | 0.599                                                                    |
|                          |                 | <b>∑v(Co<sup>II</sup>) = 3.607</b>                                      | <b>∑v(Co<sup>III</sup>) = 3.293</b>                                      |
| Co(2)–O(5)               | 2.0955(17)      | 0.330                                                                   | 0.290                                                                    |
| Co(2)–N(3 <sup>1</sup> ) | 2.155(2)        | 0.309                                                                   | 0.285                                                                    |
| Co(2)–N(10)              | 2.0875(19)      | 0.370                                                                   | 0.341                                                                    |
| Co(2)–N(13)              | 2.168(2)        | 0.298                                                                   | 0.275                                                                    |
| Co(2)–N(15)              | 2.089(2)        | 0.369                                                                   | 0.340                                                                    |
| Co(2)–N(17)              | 2.147(2)        | 0.315                                                                   | 0.291                                                                    |
|                          |                 | <b>∑v(Co<sup>II</sup>) = 1.991</b>                                      | <b>∑v(Co<sup>III</sup>) = 1.822</b>                                      |
| Co(3)–O(6)               | 1.8843(17)      | 0.584                                                                   | 0.513                                                                    |
| Co(3)–O(8)               | 1.8918(17)      | 0.572                                                                   | 0.502                                                                    |
| Co(3)–N(18)              | 1.915(2)        | 0.590                                                                   | 0.544                                                                    |
| Co(3)–N(23)              | 1.902(2)        | 0.611                                                                   | 0.564                                                                    |
| Co(3)–N(24)              | 1.900(2)        | 0.615                                                                   | 0.567                                                                    |
| Co(3)–N(29)              | 1.8975(19)      | 0.619                                                                   | 0.571                                                                    |
|                          |                 | <b>∑v(Co<sup>II</sup>) = 3.591</b>                                      | <b>∑v(Co<sup>III</sup>) = 3.261</b>                                      |

Bond Valence =  $\exp[(R_0 - d_{ij})/b]$ ,  $R_0 = 1.685$  for Co<sup>II</sup>–O, 1.720 for Co<sup>II</sup>–N, 1.637 for Co<sup>III</sup>–O and 1.690 for Co<sup>III</sup>–N,  $b = 0.37$ .<sup>1</sup>

**Table S7.** Selected bond angles (°) for complex **3**.

| Complex <b>3</b>        |           |                          |           |
|-------------------------|-----------|--------------------------|-----------|
| Bond                    | Angle / ° | Bond                     | Angle / ° |
| O3–Co1–N7               | 165.74(7) | N6–Co1–N7                | 101.70(8) |
| O3–Co1–N1               | 89.32(8)  | N6–Co1–N12               | 177.67(9) |
| O1–Co1–O3               | 90.90(7)  | N6–Co1–N1                | 80.76(8)  |
| O1–Co1–N7               | 90.44(8)  | N12–Co1–O3               | 85.20(8)  |
| O1–Co1–N1               | 165.87(8) | N12–Co1–O1               | 94.29(8)  |
| N7–Co1–N1               | 92.82(8)  | N12–Co1–N7               | 80.55(8)  |
| N6–Co1–O3               | 92.56(8)  | N12–Co1–N1               | 99.81(8)  |
| N6–Co1–O1               | 85.12(8)  | O5–Co2–N13               | 85.95(7)  |
| O5–Co2–N3 <sup>1</sup>  | 169.53(7) | N15–Co2–O5               | 98.26(7)  |
| O5–Co2–N17              | 91.53(7)  | N15–Co2–N13              | 74.72(7)  |
| N10–Co2–O5              | 85.00(7)  | N15–Co2–N3 <sup>1</sup>  | 84.66(7)  |
| N10–Co2–N15             | 176.70(8) | N15–Co2–N17              | 74.89(8)  |
| N10–Co2–N13             | 106.14(7) | N3 <sup>1</sup> –Co2–N13 | 85.13(8)  |
| N10–Co2–N3 <sup>1</sup> | 92.22(8)  | N17–Co2–N13              | 148.80(8) |
| N10–Co2–N17             | 104.60(8) | N17–Co2–N3 <sup>1</sup>  | 98.94(8)  |
| O8–Co3–N29              | 84.92(8)  | O6–Co3–N23               | 84.85(8)  |
| O8–Co3–N24              | 165.06(8) | N29–Co3–N24              | 80.52(9)  |
| O8–Co3–N18              | 89.87(8)  | N29–Co3–N18              | 106.58(8) |
| O8–Co3–N23              | 92.95(8)  | N29–Co3–N23              | 172.67(9) |
| O6–Co3–O8               | 91.57(7)  | N24–Co3–N18              | 91.09(9)  |
| O6–Co3–N29              | 88.19(8)  | N24–Co3–N23              | 101.91(8) |
| O6–Co3–N24              | 91.30(8)  | N23–Co3–N18              | 80.39(8)  |
| O6–Co3–N18              | 165.23(8) |                          |           |

1: 1-x,1-y,1-z

**Table S8.** Co–O and Co–N bond lengths (Å) and BVS values for Co atoms of complex **4**.

| Complex <b>4</b> |                 |                                                                         |                                                                          |
|------------------|-----------------|-------------------------------------------------------------------------|--------------------------------------------------------------------------|
| Bond             | Bond Length / Å | Bond Valence                                                            | Bond Valence                                                             |
|                  |                 | calculated by Co <sup>II</sup> –N/O<br><i>R</i> <sub>0</sub> parameters | calculated by Co <sup>III</sup> –N/O<br><i>R</i> <sub>0</sub> parameters |
| Co(1)–O(2)       | 1.897(3)        | 0.564                                                                   | 0.495                                                                    |
| Co(1)–O(3)       | 1.895(4)        | 0.567                                                                   | 0.498                                                                    |
| Co(1)–N(1)       | 1.913(4)        | 0.594                                                                   | 0.547                                                                    |
| Co(1)–N(6)       | 1.899(4)        | 0.616                                                                   | 0.568                                                                    |
| Co(1)–N(7)       | 1.905(4)        | 0.606                                                                   | 0.559                                                                    |
| Co(1)–N(12)      | 1.907(4)        | 0.603                                                                   | 0.556                                                                    |
|                  |                 | <b>Σv(Co<sup>II</sup>) = 3.550</b>                                      | <b>Σv(Co<sup>III</sup>) = 3.223</b>                                      |
| Co(2)–O(14)      | 2.609(2)        | 0.348                                                                   | 0.306                                                                    |
| Co(2)–N(15)      | 2.204(3)        | 0.267                                                                   | 0.246                                                                    |
| Co(2)–N(22)      | 2.066(2)        | 0.391                                                                   | 0.361                                                                    |
| Co(2)–N(25)      | 2.167(3)        | 0.299                                                                   | 0.299                                                                    |
| Co(2)–N(27)      | 2.072(3)        | 0.388                                                                   | 0.358                                                                    |
| Co(2)–N(29)      | 2.142(3)        | 0.322                                                                   | 0.275                                                                    |
|                  |                 | <b>Σv(Co<sup>II</sup>) = 2.017</b>                                      | <b>Σv(Co<sup>III</sup>) = 1.845</b>                                      |
| Co(3)–O(5)       | 1.899(2)        | 0.563                                                                   | 0.494                                                                    |
| Co(3)–O(7)       | 1.893(2)        | 0.571                                                                   | 0.502                                                                    |
| Co(3)–N(13)      | 1.919(3)        | 0.599                                                                   | 0.544                                                                    |
| Co(3)–N(18)      | 1.896 (3)       | 0.603                                                                   | 0.558                                                                    |
| Co(3)–N(19)      | 1.902(3)        | 0.605                                                                   | 0.556                                                                    |
| Co(3)–N(24)      | 1.890(3)        | 0.611                                                                   | 0.564                                                                    |
|                  |                 | <b>Σv(Co<sup>II</sup>) = 3.543</b>                                      | <b>Σv(Co<sup>III</sup>) = 3.218</b>                                      |

Bond Valence =  $\exp[(R_0 - d_{ij})/b]$ ,  $R_0 = 1.685$  for Co<sup>II</sup>–O, 1.720 for Co<sup>II</sup>–N, 1.637 for Co<sup>III</sup>–O and 1.690 for Co<sup>III</sup>–N,  $b = 0.37$ .<sup>1</sup>

**Table S9.** Selected bond angles (°) for complex **4**.

| Complex 4          |            |                    |            |
|--------------------|------------|--------------------|------------|
| Bond               | Angle / °  | Bond               | Angle / °  |
| O(2)–Co(1)–O(3)    | 93.32(15)  | O(2)–Co(1)–N(1)    | 165.10(17) |
| O(2)–Co(1)–N(6)    | 84.77(16)  | O(2)–Co(1)–N(7)    | 89.51(16)  |
| O(2)–Co(1)–N(12)   | 91.73(16)  | O(3)–Co(1)–N(1)    | 89.59(17)  |
| O(3)–Co(1)–N(6)    | 90.74(16)  | O(3)–Co(1)–N(7)    | 164.94(17) |
| O(3)–Co(1)–N(12)   | 84.78(17)  | N(1)–Co(1)–N(6)    | 80.58(17)  |
| N(1)–Co(1)–N(7)    | 91.48(18)  | N(1)–Co(1)–N(12)   | 103.09(18) |
| N(6)–Co(1)–N(7)    | 104.25(18) | N(6)–Co(1)–N(12)   | 174.15(18) |
| N(7)–Co(1)–N(12)   | 80.35(18)  | O(14)–Co(2)–N(15A) | 170.85(17) |
| O(14)–Co(2)–N(22)  | 90.21(16)  | O(14)–Co(2)–N(25)  | 87.21(17)  |
| O(14)–Co(2)–N(27)  | 92.32(17)  | O(14)–Co(2)–N(29)  | 92.38(17)  |
| N(15A)–Co(2)–N(22) | 89.43(16)  | N(15A)–Co(2)–N(25) | 84.11(16)  |
| N(15A)–Co(2)–N(27) | 88.28(16)  | N(15A)–Co(2)–N(29) | 102.80(17) |
| N(22)–Co(2)–N(25)  | 106.23(17) | N(22)–Co(2)–N(27)  | 177.15(17) |
| N(22)–Co(2)–N(29)  | 102.80(17) | N(25)–Co(2)–N(27)  | 75.20(17)  |
| O(5)–Co(3)–O(7)    | 90.58(15)  | O(5)–Co(3)–N(13)   | 90.26(16)  |
| O(5)–Co(3)–N(18)   | 94.38(16)  | O(5)–Co(3)–N(19)   | 165.62(16) |
| O(5)–Co(3)–N(24)   | 84.76(16)  | O(7)–Co(3)–N(13)   | 166.08(15) |
| O(7)–Co(3)–N(18)   | 85.10(15)  | O(7)–Co(3)–N(19)   | 88.78(16)  |
| O(7)–Co(3)–N(24)   | 94.62(16)  | N(13)–Co(3)–N(18)  | 80.99(16)  |
| N(13)–Co(3)–N(19)  | 93.80(17)  | N(13)–Co(3)–N(24)  | 99.29(17)  |
| N(18)–Co(3)–N(19)  | 99.87(17)  | N(18)–Co(3)–N(24)  | 179.09(17) |
| N(19)–Co(3)–N(24)  | 80.98(17)  |                    |            |

A: 1-x,1-y,1-z



**Table S10.** SHAPE analysis for complexes **1–4**.

| <b>complex</b> | <b>HP-6</b> | <b>PPY-6</b> | <b>OC-6</b>  | <b>TPR-6</b> | <b>JPPY-6</b> |
|----------------|-------------|--------------|--------------|--------------|---------------|
| <b>1</b>       | 32.632      | 29.967       | <b>0.022</b> | 16.408       | 33.428        |
| <b>2</b>       | 30.291      | 28.925       | <b>0.145</b> | 16.089       | 32.228        |
| <b>3</b>       | 32.224      | 21.994       | <b>2.333</b> | 10.128       | 25.651        |
| <b>4</b>       | 33.515      | 24.279       | <b>1.794</b> | 11.506       | 28.003        |



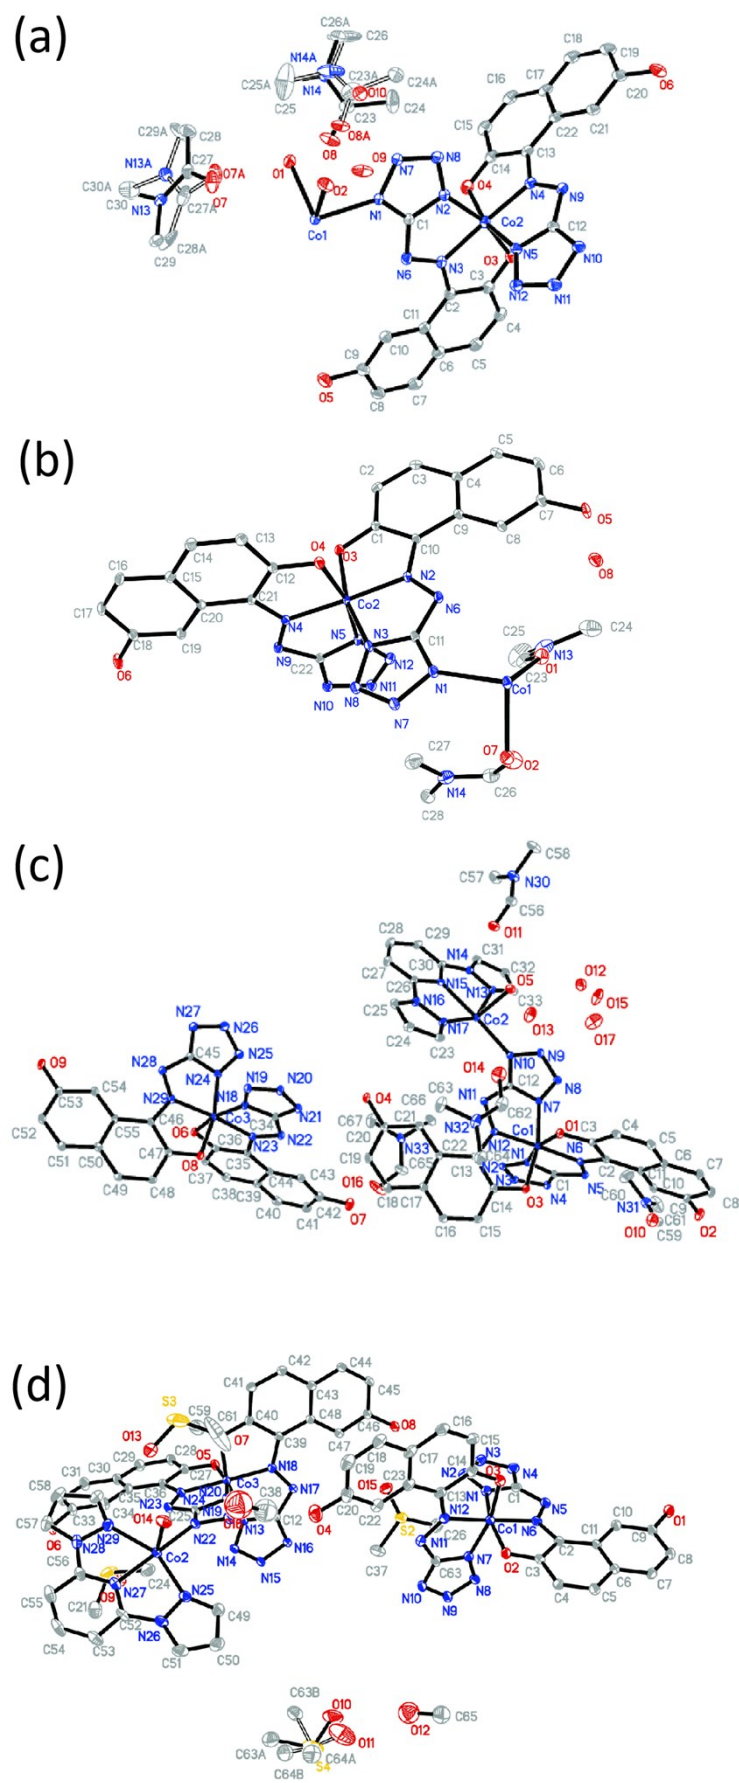

**Fig. S1** ORTEP views (30% thermal ellipsoids) for complexes **1(a)**, **2(b)**, **3(c)** and **4(d)**.

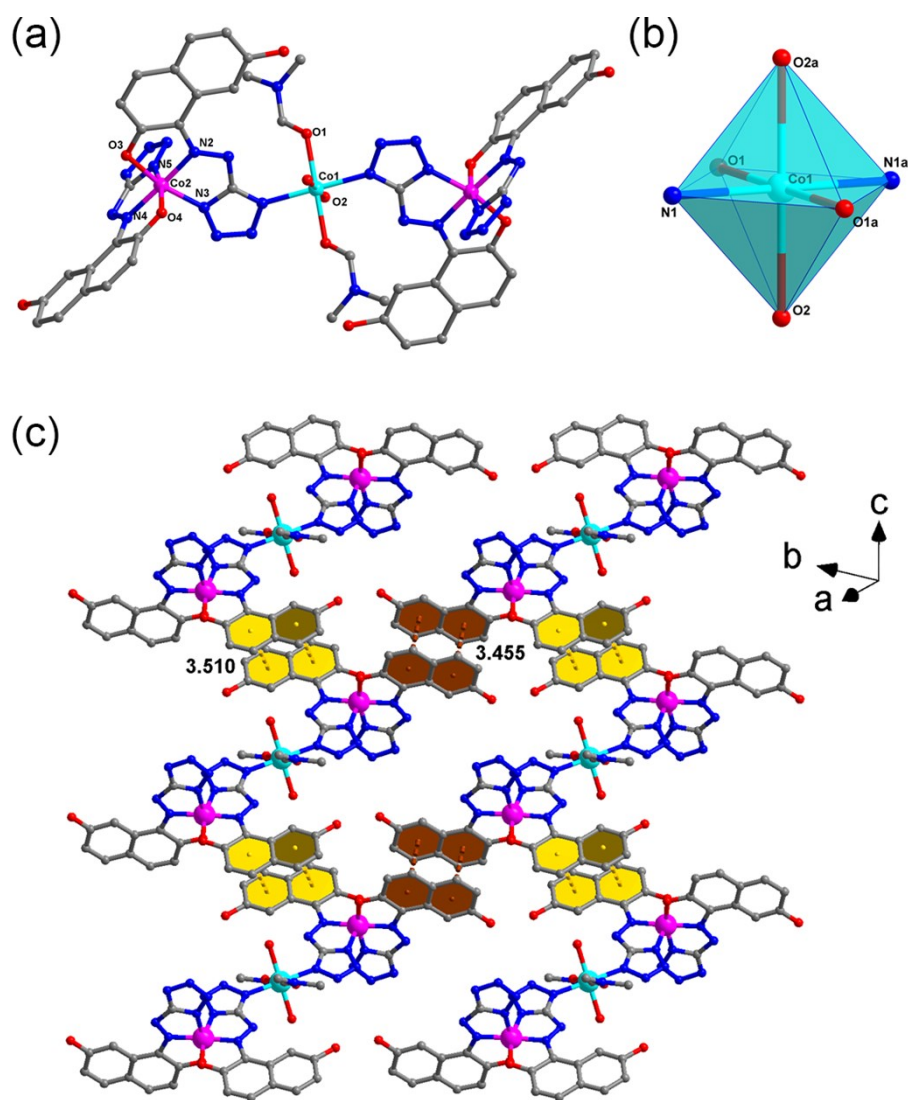

**Fig. S2** Structural illustrations of complex 2: Coordination environments of Co1 and Co2 (a); Local coordination geometry of Co1 (b) and 2D structure through the  $\pi$ ... $\pi$  stacking interaction between naphthalene rings (c). Color code: pink, Co<sup>III</sup>; turquoise, Co<sup>II</sup>; gray, C; blue, N; red, O. Hydrogen atoms and uncoordinated solvent molecules were omitted for clarity reason.

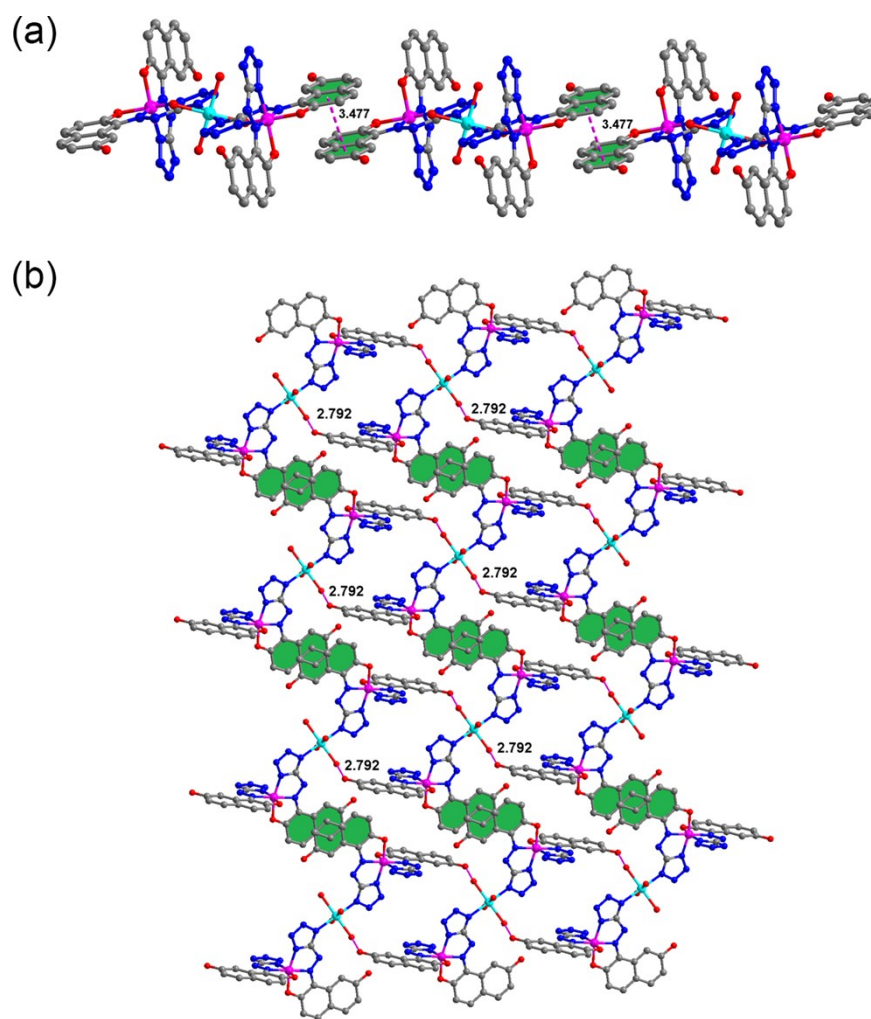

**Fig. S3** The 1D structure through the  $\pi\cdots\pi$  stacking interaction between naphthalene rings (a) and the 2D layer through hydrogen-bonds and the  $\pi\cdots\pi$  stacking interaction between naphthalene rings (b) of complex **1**.

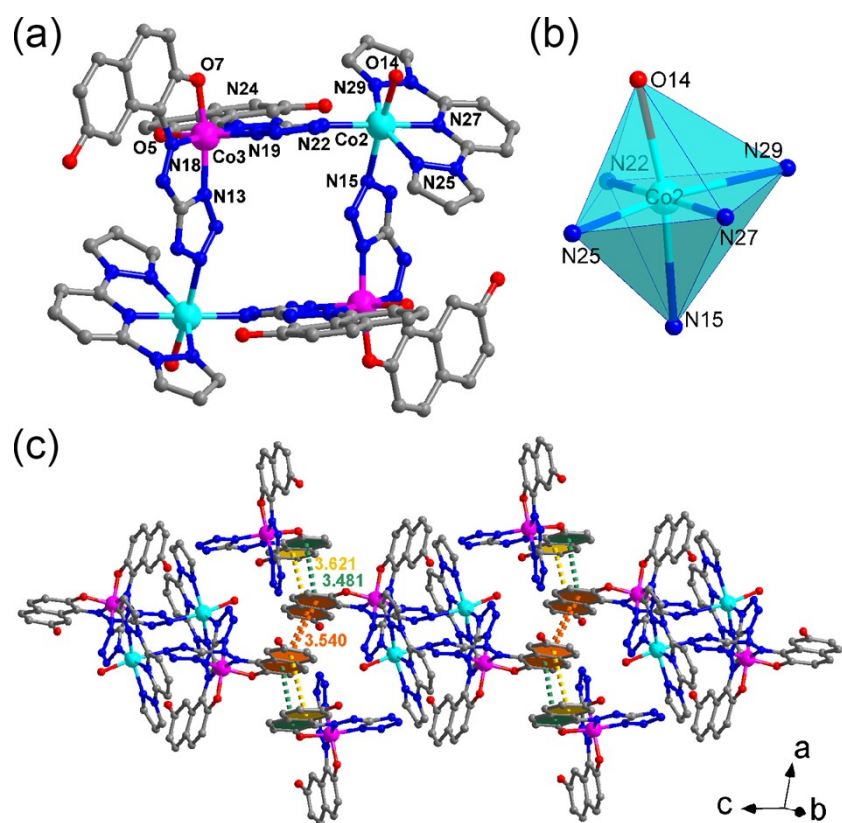

**Fig. S4** Crystal structure of cation of complex **4** (a); Local coordination geometry of Co2 (b) and 1D structure through the  $\pi\cdots\pi$  stacking interaction between naphthalene rings (c). Color code: pink, Co<sup>III</sup>; turquoise, Co<sup>II</sup>; gray, C; blue, N; red, O. Hydrogen atoms were omitted for clarity reason.

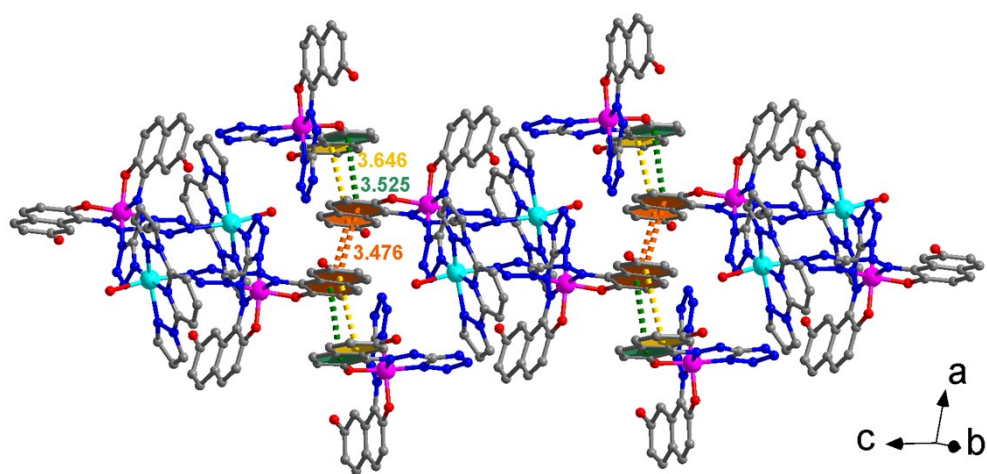

**Fig. S5** 1D structure through the  $\pi\cdots\pi$  stacking interaction between naphthalene rings of complex **3**.

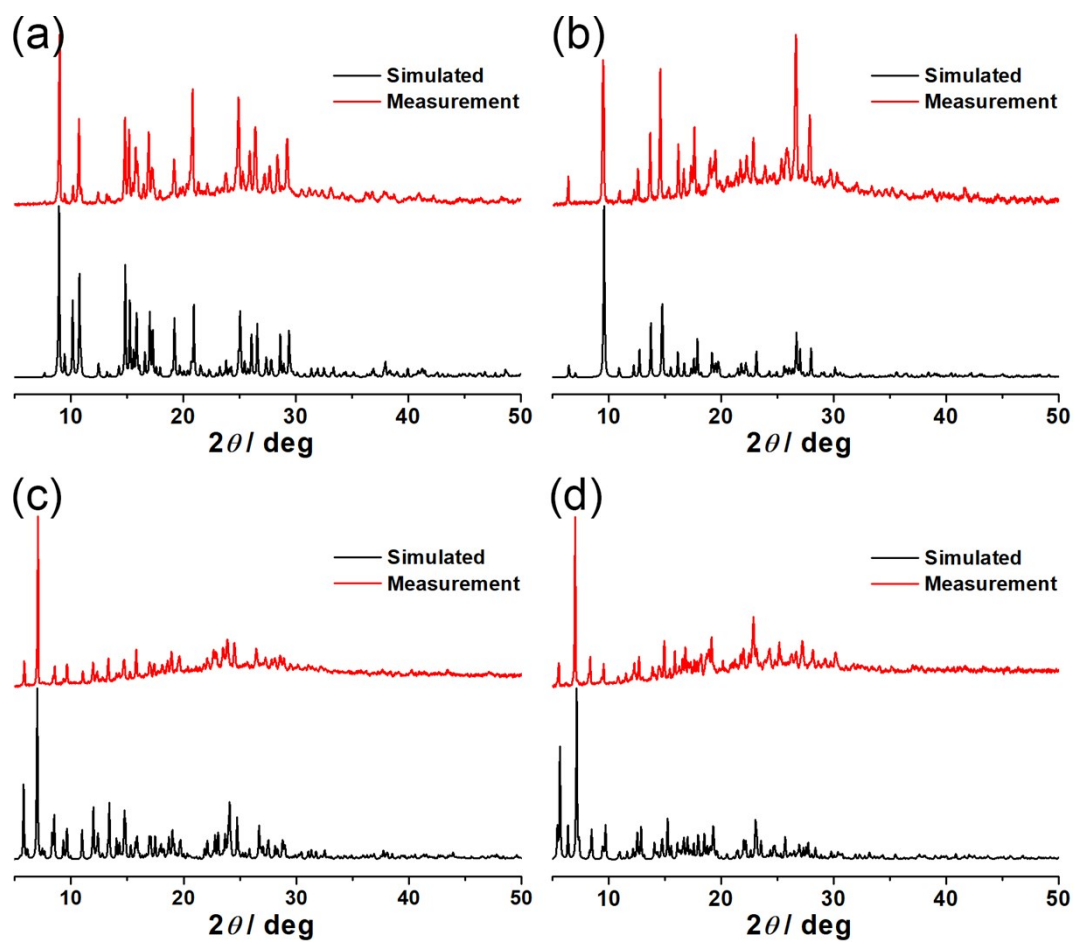

**Fig. S6** Powder X-ray diffraction (PXRD) patterns for complexes **1(a)**, **2(b)**, **3(c)** and **4(d)**

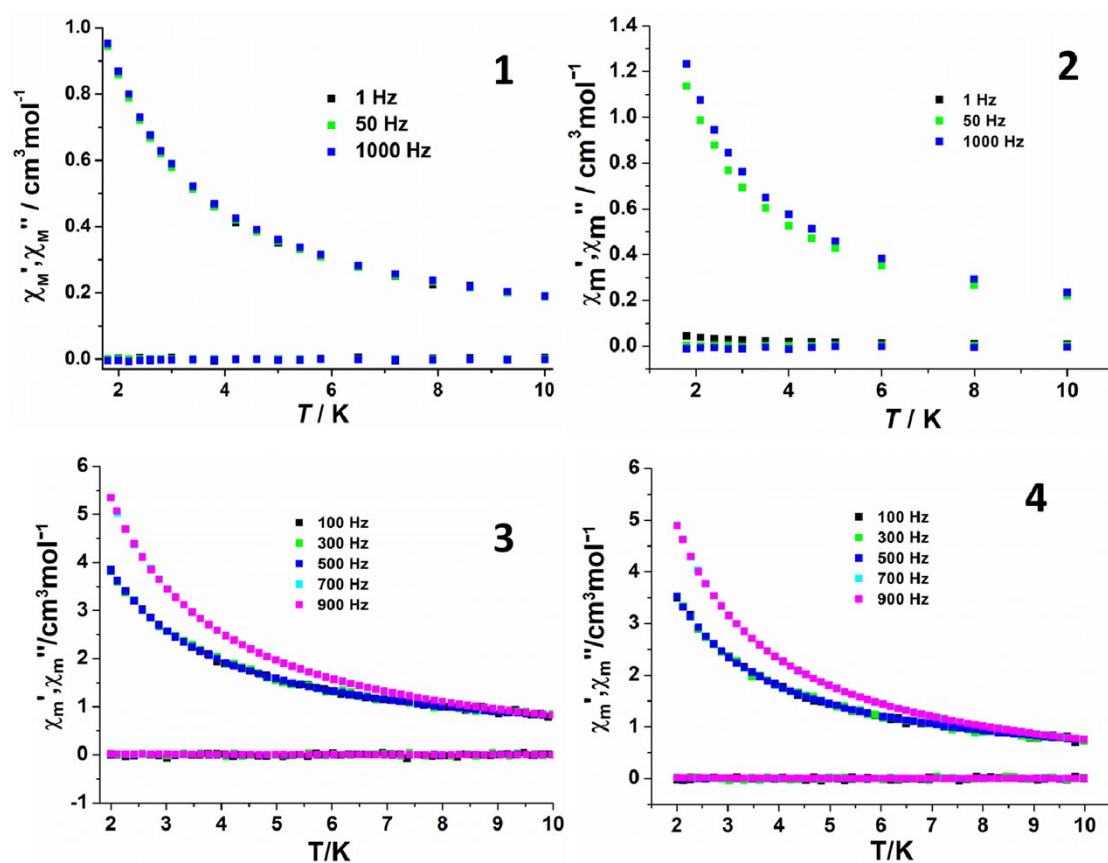

**Fig. S7** Temperature dependence of the in-phase and out-of-phase for complexes 1–4 at zero DC-external field.



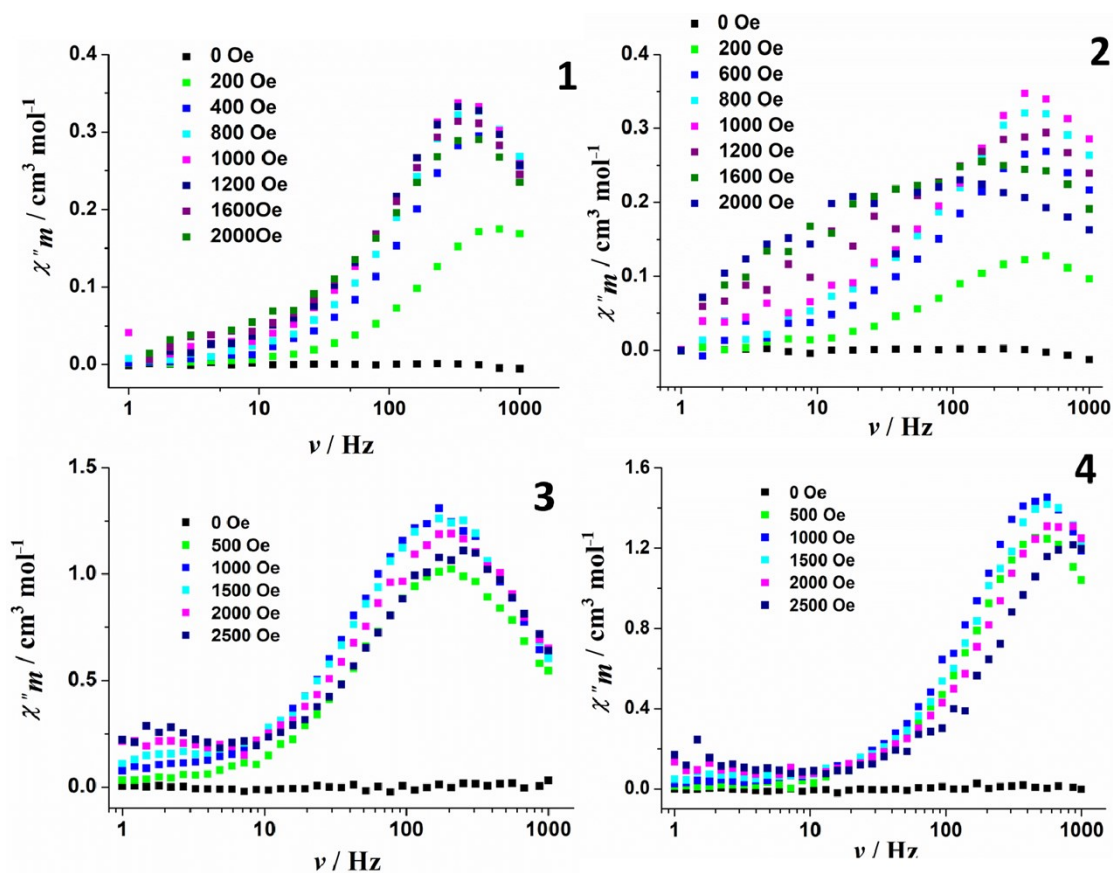

**Fig. S8** AC susceptibility data for complexes 1–4 at 2 K under DC applied fields in the range 0–1000 Oe.

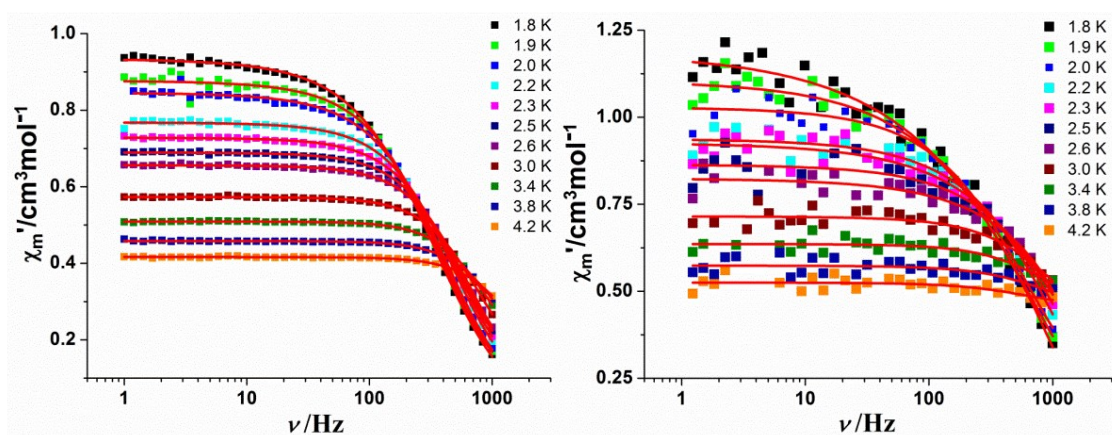

**Fig. S9** Frequency dependence of the in-phase components for the ac magnetic susceptibility in a 1 kOe dc field for complexes 1 (left) and 2 (right). The solid lines represent the best fits with modified Debye functions (see the text).

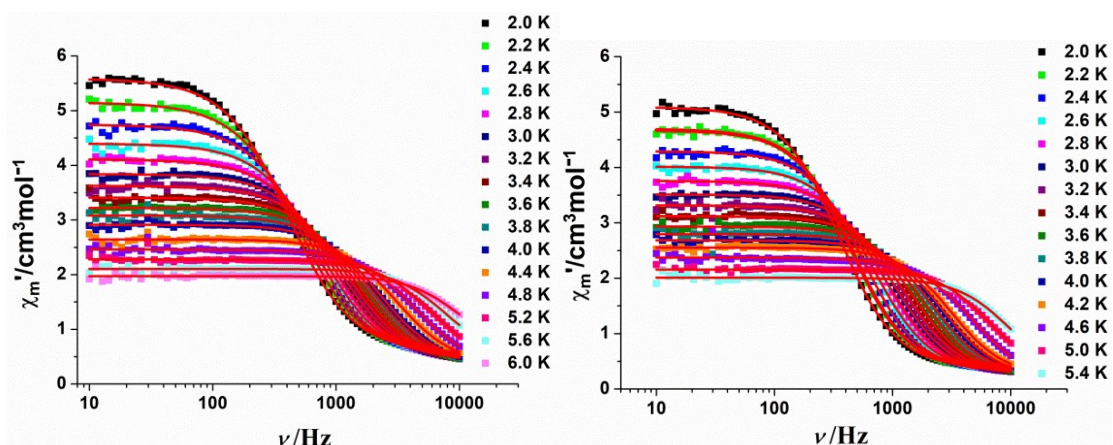

**Fig. S10** Frequency dependence of the in-phase components for the ac magnetic susceptibility in a 1 kOe dc field for complexes **3** (left) and **4** (right). The solid lines represent the best fits with modified Debye functions (see the text).

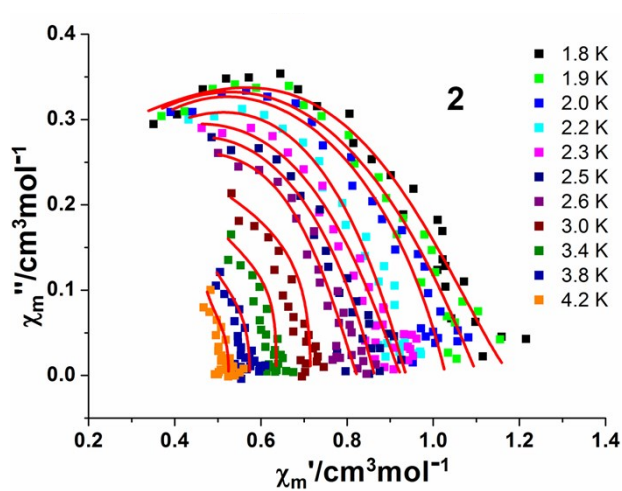

**Fig. S11** Cole–Cole plots for complex **2**. The solid lines represent the best fits with modified Debye functions (see the text).

## References

- 1 Brown, I. D., *IUCrJ*, 2017, **4**, 514-515.
